# Supplementary material for: Risk Assessment of Insecticides Used in Tomato to Control Whitefly on the Predator Macrolophus basicornis (Hemiptera: Miridae)
Source: MDPI journal article supplement (doi:10.3390/insects12121092), 2021-12-07
Supplement: s1 [file s1]

**Risk assessment of insecticides used in tomato to control whitefly on the predator *Macrolophus basicornis* (Hemiptera: Miridae)**

*Supplementary Material*

Include:

Figure S1: Detail of experimental units with flasks used to insert the petiole of each tomato leave to maintain turgidity during the bioassay and the cage covered with voile fabric.

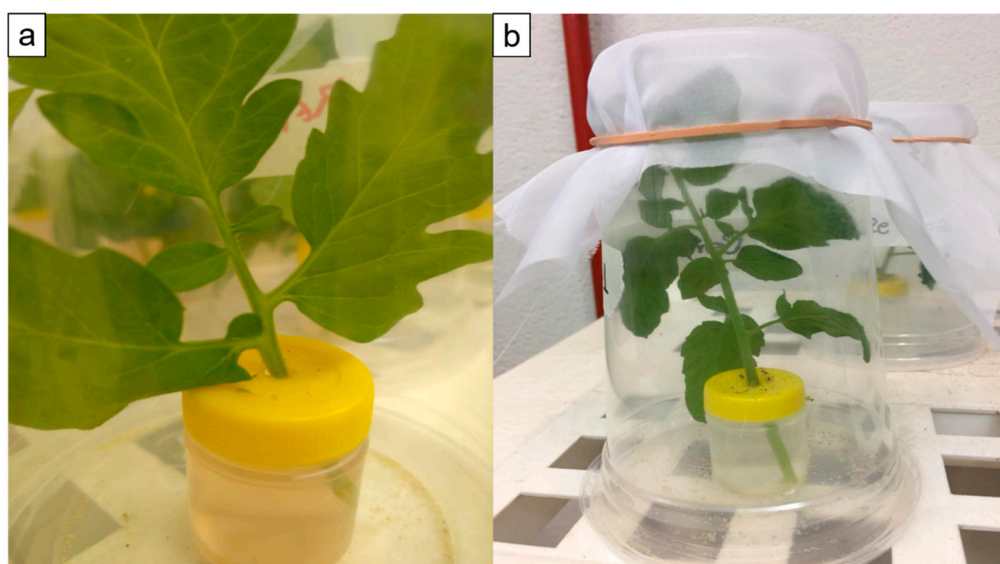

**Figure S1** a) Detail of the tomato leave inserted in the orifice of the flask (20 mL) with a lid containing an orifice, previously filled with water to maintain turgidity during the bioassay; b) the flask with the leave inside the cage (12 cm high × 5 cm diameter) covered with voile fabric to prevent accumulation of toxic gases and retain the insects, representing the experimental unit.
